# Supplementary material for: Soil Zinc Is Associated with Serum Zinc But Not with Linear Growth of Children in Ethiopia
Source: MDPI journal article supplement (doi:10.3390/nu11020221), 2019-01-22
Supplement: s1 [file s1]

**Table S1.** Multi-level mixed linear regression model predicting serum zinc: subgroup analyses by age <sup>1</sup>.

|                                                      | <b>Model 1 (Children ≥2 4 months)</b> |           |          | <b>Model 2 (Children ≤ 23 months)</b> |           |          |
|------------------------------------------------------|---------------------------------------|-----------|----------|---------------------------------------|-----------|----------|
| <b>Fixed effects</b>                                 | <b>Estimate</b>                       | <b>SE</b> | <b>p</b> | <b>Estimate</b>                       | <b>SE</b> | <b>p</b> |
| Soil zinc (mg/kg)                                    | 0.8                                   | 0.4       | 0.043    | 1.8                                   | 1.1       | 0.099    |
| Diarrhea in past two weeks                           | -0.8                                  | 2.1       | 0.692    | -6.1                                  | 3.8       | 0.107    |
| CRP (mg/L) and AGP (g/L) (ref=normal)                |                                       |           |          |                                       |           |          |
| Elevated CRP only (mg /L)                            | -1.6                                  | 7.4       | 0.827    | -11.5                                 | 15.1      | 0.446    |
| Elevated AGP only (g/L)                              | -4.8                                  | 1.5       | 0.002    | -0.1                                  | 3.5       | 0.972    |
| Elevated AGP (g/L) and CRP (mg/L)                    | -7.0                                  | 2.3       | 0.002    | -6.8                                  | 5.0       | 0.175    |
| Sex of child (female)                                | -2.1                                  | 1.4       | 0.127    | 0.3                                   | 3.2       | 0.918    |
| Wealth status (Ref = wealthier)                      |                                       |           |          |                                       |           |          |
| Wealth status (poorer )                              | 1.6                                   | 1.9       | 0.402    | 4.3                                   | 4.1       | 0.293    |
| Wealth status (medium)                               | 2.2                                   | 1.8       | 0.223    | 7.7                                   | 4.0       | 0.052    |
| Time since most recent meal (hr)                     | -4.9                                  | 3.6       | 0.173    | -18.2                                 | 8.8       | 0.040    |
| FIES <sup>2</sup>                                    | -0.2                                  | 0.3       | 0.363    | 0.6                                   | 0.6       | 0.343    |
| Consumption of meat or meat products in the last 24h | -2.0                                  | 2.1       | 0.345    | -17.2                                 | 6.9       | 0.014    |
| <b>Random effects</b>                                |                                       |           |          |                                       |           |          |
| Intercept (cluster)                                  | 32.4                                  | 13.4      | 0.008    | 0.0                                   |           |          |

<sup>1</sup> Models adjusted for regions as fixed effects. The restricted maximum likelihood (REML) method was used to estimate the parameters. <sup>2</sup> FIES = The Food Insecurity Experience Scale.

**Table S2.** Multi-level mixed linear regression models predicting height-for-age Z-score: subgroup analyses by age <sup>1</sup>.

|                                          | <b>Model 1</b>                |           |                 | <b>Model 2</b>                |           |                 |
|------------------------------------------|-------------------------------|-----------|-----------------|-------------------------------|-----------|-----------------|
|                                          | <b>(Children ≥ 24 months)</b> |           |                 | <b>(Children ≤ 23 months)</b> |           |                 |
| <b>Fixed effects</b>                     | <b>Estimate</b>               | <b>SE</b> | <b><i>p</i></b> | <b>Estimate</b>               | <b>SE</b> | <b><i>p</i></b> |
| Soil zinc (mg/kg)                        | 0.017                         | 0.034     | 0.612           | 0.056                         | 0.121     | 0.645           |
| Serum zinc (μg/dL)                       | 0.000                         | 0.003     | 0.941           | −0.008                        | 0.008     | 0.295           |
| Diarrhea in past two weeks               | −0.423                        | 0.191     | 0.027           | −0.158                        | 0.375     | 0.675           |
| CRP (mg/L) and AGP (g/L)<br>(ref=normal) |                               |           |                 |                               |           |                 |
| Elevated CRP only (mg /L)                | −0.247                        | 0.670     | 0.713           | −0.503                        | 1.481     | 0.735           |
| Elevated AGP only (g/L)                  | −0.044                        | 0.141     | 0.755           | 0.041                         | 0.345     | 0.907           |
| Elevated AGP (g/L) and CRP<br>(mg/L)     | −0.050                        | 0.207     | 0.808           | 0.130                         | 0.453     | 0.774           |
| Sex of child (female)                    | 0.220                         | 0.125     | 0.078           | 0.428                         | 0.298     | 0.153           |
| Wealth status (Ref = wealthier)          |                               |           |                 |                               |           |                 |
| Wealth status (poorer )                  | −0.072                        | 0.177     | 0.683           | −0.252                        | 0.409     | 0.538           |
| Wealth status (medium)                   | −0.055                        | 0.161     | 0.734           | −0.384                        | 0.385     | 0.319           |
| FIES <sup>2</sup>                        | −0.023                        | 0.023     | 0.329           | −0.056                        | 0.059     | 0.345           |
| <b>Random effects</b>                    |                               |           |                 |                               |           |                 |
| Intercept (cluster)                      | 0.245                         | 0.100     | 0.007           | 1.253                         | 0.570     | 0.014           |

<sup>1</sup> Models adjusted for regions as fixed effects. The restricted maximum likelihood (REML) method was used to estimate the parameters. <sup>2</sup> FIES = The Food Insecurity Experience Scale.

**Table S3.** Multi-level mixed linear regression model predicting serum zinc: subgroup analyses by residence <sup>1</sup>.

| <b>Fixed effects</b>                                 | <b>Model 1 (Urban)</b> |           |                 | <b>Model 2 (Rural)</b> |           |                 |
|------------------------------------------------------|------------------------|-----------|-----------------|------------------------|-----------|-----------------|
|                                                      | <b>Estimate</b>        | <b>SE</b> | <b><i>p</i></b> | <b>Estimate</b>        | <b>SE</b> | <b><i>p</i></b> |
| Soil zinc (mg/kg)                                    | 2.7                    | 1.0       | 0.008           | 0.9                    | 0.3       | 0.006           |
| Diarrhea in past two weeks                           | -0.3                   | 5.8       | 0.957           | -1.1                   | 1.9       | 0.580           |
| CRP (mg/L) and AGP (g/L) (ref=normal)                |                        |           |                 |                        |           |                 |
| Elevated CRP only (mg /L)                            | -14.6                  | 20.2      | 0.472           | -2.5                   | 7.0       | 0.719           |
| Elevated AGP only (g/L)                              | -10.9                  | 3.7       | 0.004           | -2.7                   | 1.5       | 0.079           |
| Elevated AGP (g/L) and CRP (mg/L)                    | -9.7                   | 5.6       | 0.087           | -5.3                   | 2.2       | 0.015           |
| Sex of child (female)                                | -3.7                   | 3.5       | 0.293           | -2.0                   | 1.4       | 0.139           |
| Wealth status (Ref = wealthier)                      |                        |           |                 |                        |           |                 |
| Wealth status (poorer )                              | 6.1                    | 7.0       | 0.385           | 2.7                    | 2.0       | 0.190           |
| Wealth status (medium)                               | -2.7                   | 6.2       | 0.658           | 3.5                    | 1.9       | 0.062           |
| Age in months (Ref=6–11 months)                      |                        |           |                 |                        |           |                 |
| Age category 2 (12–23 months)                        | -10.1                  | 9.5       | 0.291           | -0.2                   | 3.7       | 0.947           |
| Age category 3 (24–59 months)                        | -10.7                  | 8.5       | 0.208           | 0.4                    | 3.3       | 0.910           |
| Time since most recent meal (hr)                     | -18.5                  | 8.6       | 0.034           | -2.6                   | 3.5       | 0.464           |
| FIES <sup>2</sup>                                    | 0.2                    | 0.7       | 0.786           | 0.0                    | 0.3       | 0.870           |
| Consumption of meat or meat products in the last 24h | -0.6                   | 4.5       | 0.894           | -3.3                   | 2.2       | 0.143           |
| <b>Random effects</b>                                |                        |           |                 |                        |           |                 |
| Intercept (cluster)                                  | 0.0                    |           |                 | 43.6                   | 13.8      | 0.001           |

<sup>1</sup> As region and urban/rural designation are closely related in Ethiopia, region was omitted from model. The restricted maximum likelihood (REML) method was used to estimate the parameters. <sup>2</sup> FIES = The Food Insecurity Experience Scale.
